# Supplementary material for: Growth of carbon nanotubes over carbon nanofibers catalyzed by bimetallic alloy nanoparticles as a bifunctional electrode for Zn–air batteries
Source: Royal Society of Chemistry journal article supplement (doi:10.1039/d3ra00352c), 2023-01-01
Supplement: d3ra00352c1.pdf [file d3ra00352c1.pdf]

## Supplementary Information

### **Growth of carbon nanotubes over carbon nanofibers catalyzed by bimetallic alloy nanoparticles as bifunctional electrode for Zn-air batteries**

Iram Aziz,<sup>a,b</sup> Xing Chen,<sup>c</sup> Xuhui Hu,<sup>d</sup> Wenjing (Angela) Zhang,<sup>e,\*</sup> Rabiya Javed Awan,<sup>a</sup> Ali Rauf,<sup>a</sup> and Salman Noshear Arshad<sup>a,\*</sup>

<sup>a</sup> Department of Chemistry and Chemical Engineering, Syed Babar Ali School of Science and Engineering, Lahore University of Management Sciences, Lahore 54792, Pakistan.

<sup>b</sup> Faculty of Sciences, Superior University Faisalabad Campus, Near Khanowana Bypass, 13-KM Satiana Road, Pakistan.

<sup>c</sup> School of Mechanical Engineering, Northwestern Polytechnical University, Xi'an, 710072, P.R China.

<sup>d</sup> College of Chemistry and Molecular Sciences, Wuhan University, Wuhan 430072, Hubei, People's Republic of China.

<sup>e</sup> Department of Environmental Engineering, Technical University of Denmark, DTU, 2800 Kgs. Lyngby, Denmark.

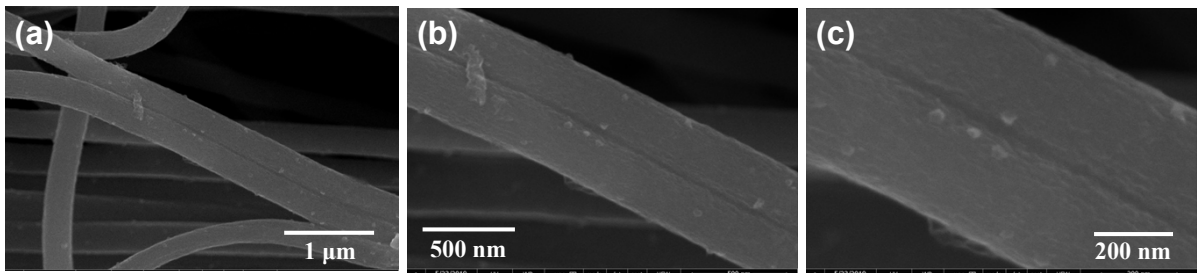

Figure S1 (a - c) SEM images of Mn-CNT@CNF carbonized at 800 °C.

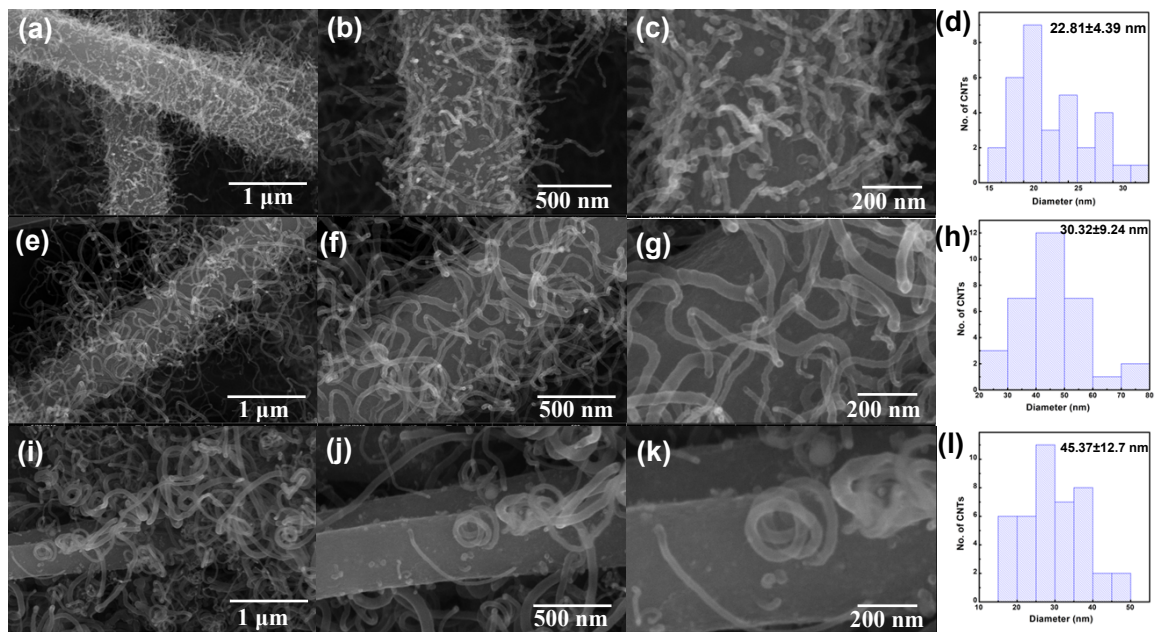

Figure S2 SEM images of (a-c) Fe-CNT@CNF, (e-g) Ni-CNT@CNF, (i-k) Co-CNT@CNF at different magnifications and (d, h, l) corresponding CNT diameter distributions.

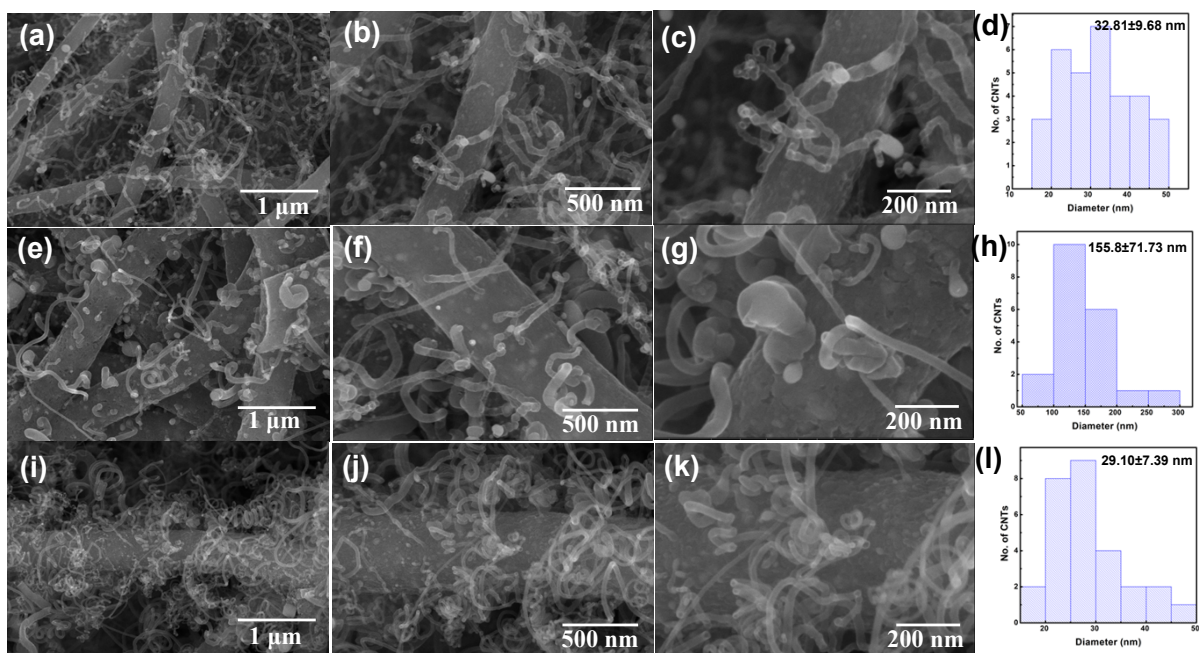

Figure S3 SEM images of (a-c) NiCo-CNT@CNF, (e-g) FeMn-CNT@CNF, (i-k) CoMn-CNT@CNF at different magnifications and (d, h, l) corresponding CNT diameter distributions.

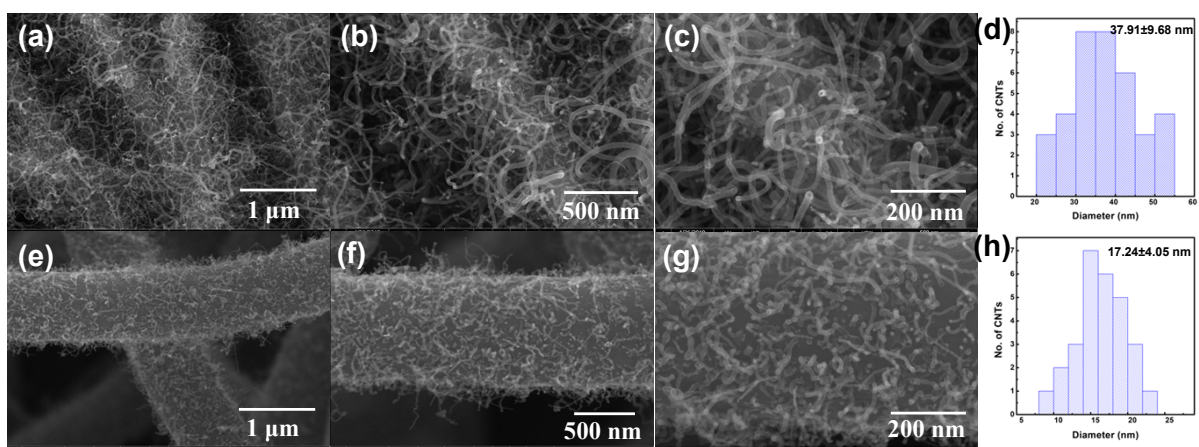

Figure S4 SEM images of (a-c) NiMn-CNT@CNF, (e-g) FeCo-CNT@CNF at different magnifications and (d & h) corresponding CNT diameter distributions.

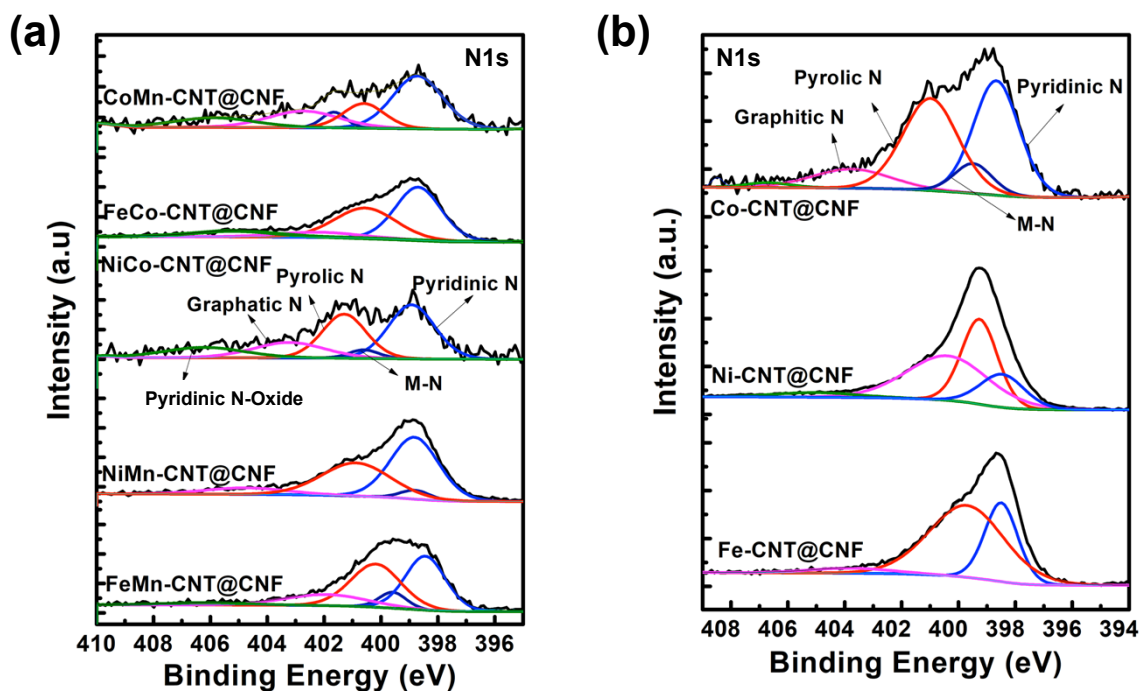

Figure S5 High resolution N 1s XPS spectra comparison of different (a) MM'-CNT@CNF and (b) M-CNT@CNF electrocatalysts.

Table S1 Comparison of different type of N doped in the prepared MM'-CNT@CNF and M-CNT@CNF electrocatalysts.

| Sr. No | Sample       | Pyridinic N (%) | Pyrolic N (%) | M-N (%) | Graphitic N (%) | Pyridinic N-Oxide (%) |
|--------|--------------|-----------------|---------------|---------|-----------------|-----------------------|
| 1      | FeNi-CNT@CNF | 43.45           | 11.34         | 11.34   | 17.00           | 2.70                  |
| 2      | FeCo-CNT@CNF | 46.74           | 35.74         |         | 8.14            | 9.39                  |
| 3      | FeMn-CNT@CNF | 35.67           | 35.73         | 4.13    | 14.86           |                       |
| 4      | NiMn-CNT@CNF | 48.17           | 36.69         | 4.23    | 8.53            | 3.11                  |
| 5      | CoMn-CNT@CNF | 44.06           | 16.94         | 6.39    | 19.70           | 2.96                  |
| 6      | NiCo-CNT@CNF | 37.69           | 29.25         | 3.85    | 16.62           | 12.59                 |
| 7      | Ni-CNT@CNF   | 17.18           | 42.66         |         | 35.86           | 4.40                  |
| 8      | Co-CNT@CNF   | 39.44           | 38.14         | 8.56    | 11.17           | 0.86                  |
| 9      | Fe-CNT@CNF   | 30.96           | 64.21         |         | 4.83            |                       |

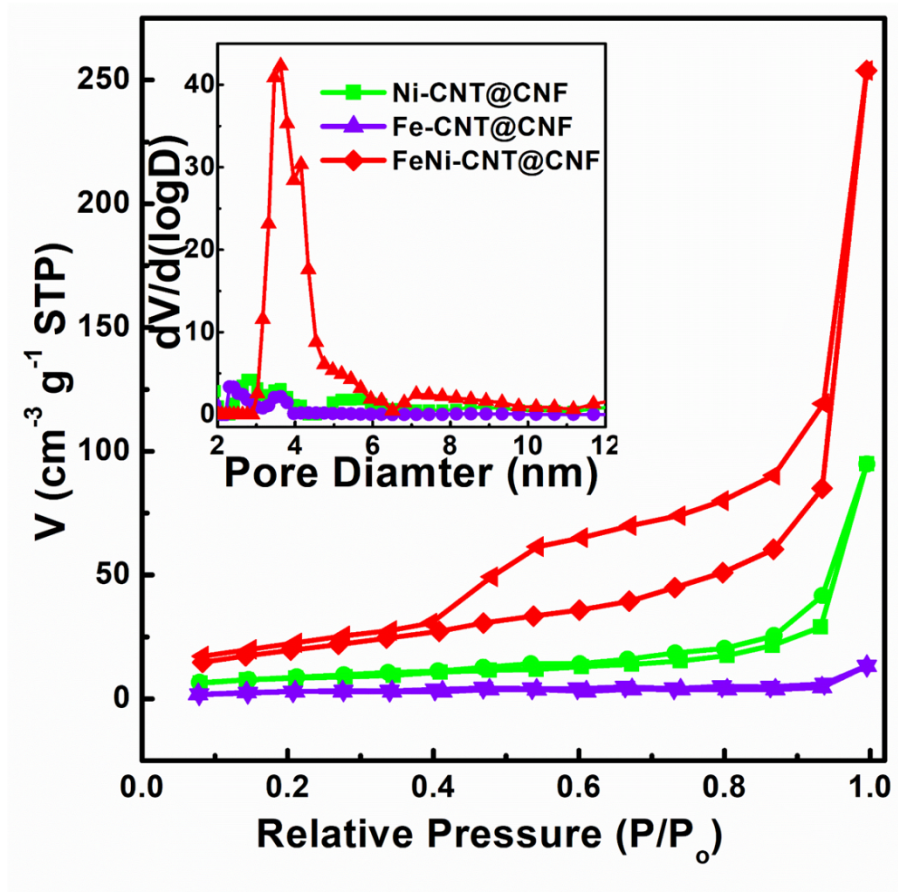

Figure S 6 Nitrogen adsorption-desorption isotherms for Fe, Ni, and FeNi encapsulated CNT@CNF nanocatalysts (inset represents the pore size distribution).

Table S 2 BET surface area and average pore size for Fe, Ni, and FeNi containing CNT@CNF nanocatalysts.

| Sample       | Surface Area ( $\text{m}^2 \text{g}^{-1}$ ) | Average Pore Size (nm) |
|--------------|---------------------------------------------|------------------------|
| Ni-CNT@CNF   | 21.610                                      | 2.897                  |
| Fe-CNT@CNF   | 6.340                                       | 2.419                  |
| FeNi-CNT@CNF | 60.275                                      | 3.627                  |

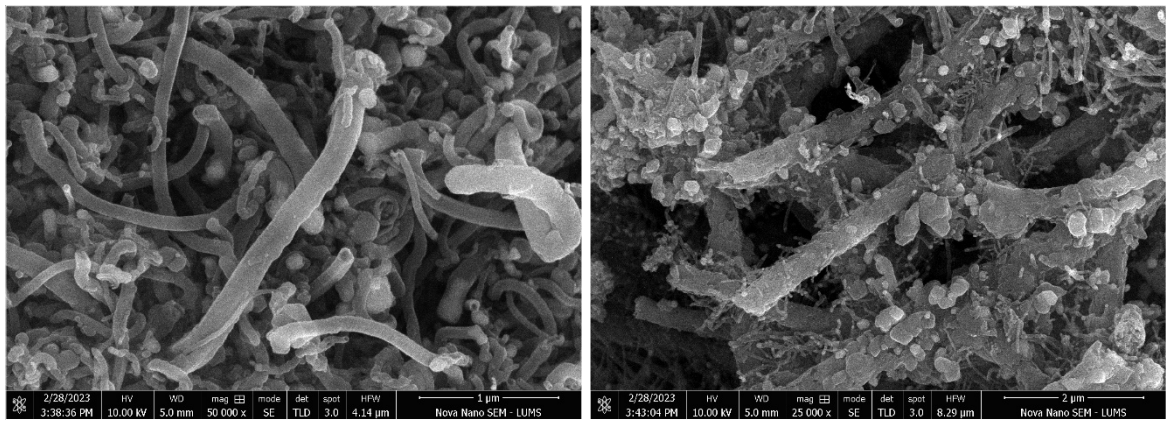

Figure S 7 SEM images of the cycled FeNi-CNT@CNF catalyst.
